# Supplementary material for: hERG-deficient human embryonic stem cell-derived cardiomyocytes for modelling QT prolongation
Source: PubMed Central journal article supplement (PMC8103639; doi:10.1186/s13287-021-02346-1), 2021-05-07

Fig.S1 hERG deficiency did not affect pluripotency of hESCs

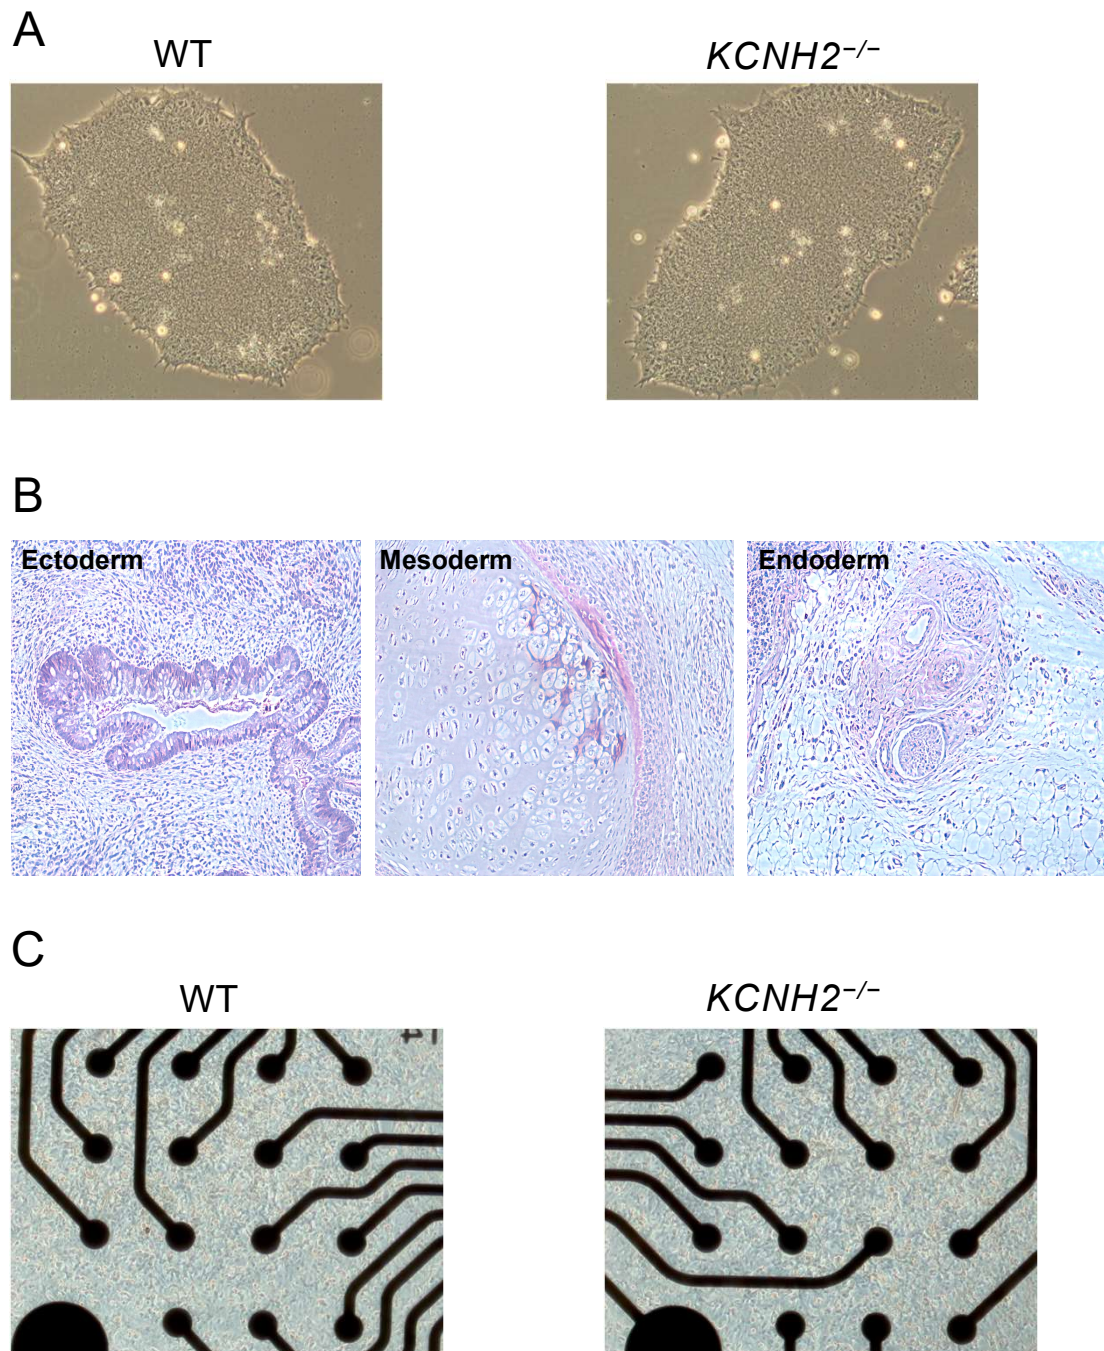

Fig.S2 Neurohormonal responses

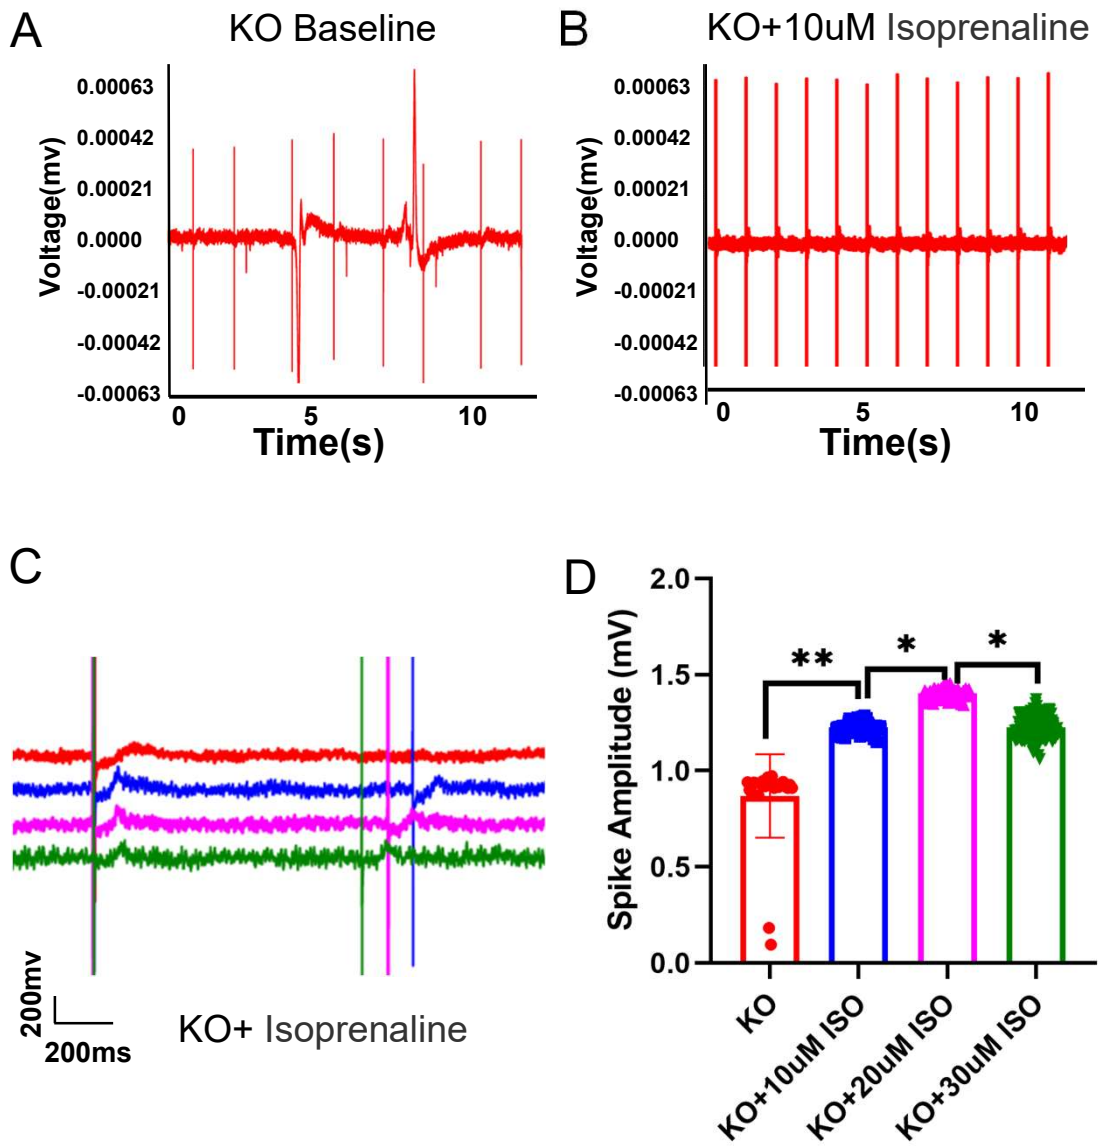

Supplement: 13287_2021_2346_MOESM1_ESM.pdf [file 13287_2021_2346_MOESM1_ESM.pdf]
